# Supplementary material for: The Interrelationship of Benefit Finding, Demoralization, and Stigma among Patients with Parkinson’s Disease and Their Caregivers
Source: MDPI journal article supplement (doi:10.3390/healthcare12090878), 2024-04-23
Supplement: s1 [file s1]

### Supplemental Tables

**Table S1** Demographic and clinical characteristics of depressive and non-depressive PD patients (N=120)

|                                | Depressive<br>N (%), N=21 | Non-depressive<br>N (%), N=99 | Total<br>N (%), N=120 | t/ $\chi^2$ | p      |
|--------------------------------|---------------------------|-------------------------------|-----------------------|-------------|--------|
| Gender                         |                           |                               |                       | 0.73        | 0.39   |
| Male                           | 14(66.7)                  | 56(56.6)                      | 70(58.3)              |             |        |
| Female                         | 7(33.3)                   | 43(43.4)                      | 50(41.7)              |             |        |
| Age, years mean (s.d.)         | 61.71±8.63                | 67.83±8.09                    | 66.76±8.48            | -3.11       | 0.002  |
| Age of onset                   | 53.52±11.01               | 59.32±10.80                   | 58.29±11.02           | -2.22       | 0.028  |
| Duration of PD (years)         | 8.19±6.19                 | 8.48±7.47                     | 8.43±7.24             | -0.17       | 0.87   |
| Years of education             | 12.38±4.44                | 11.03±4.46                    | 11.27±4.47            | 1.26        | 0.21   |
| Education                      |                           |                               |                       | 0.35        | 0.55   |
| Less than 12 years             | 6(28.6)                   | 35(35.4)                      | 41(34.2)              |             |        |
| More than or equal to 12 years | 15(71.4)                  | 64(64.6)                      | 79(65.8)              |             |        |
| Marital Status                 |                           |                               |                       | 3.64        | 0.06   |
| Unmarried                      | 5(23.8)                   | 9(9.1)                        | 14(11.7)              |             |        |
| Married                        | 16(76.2)                  | 90(90.9)                      | 106(88.3)             |             |        |
| Unemployed                     | 15(71.4)                  | 81(81.8)                      | 96(80.0)              | 1.17        | 0.28   |
| Comorbid with other diseases   | 11(52.4)                  | 56(56.6)                      | 67(55.8)              | 0.12        | 0.73   |
| Suicide history                | 1(4.8)                    | 1(1.0)                        | 2(1.7)                | 1.48        | 0.22   |
| Anxiolytics/Hypnotics use      | 13(61.9)                  | 30(30.3)                      | 43(35.8)              | 7.53        | 0.006  |
| Family psychiatric history     |                           |                               |                       | 0.43        | 0.51   |
| No psychiatric history         | 21(100.0)                 | 97(98.0)                      | 118(98.3)             |             |        |
| Depressive disorder            | 0                         | 2(2.0)                        | 2(1.7)                |             |        |
| NPRS                           | 4.71±2.53                 | 3.17±2.72                     | 3.44±2.74             | 2.39        | 0.018  |
| UPDRS total scores             | 41.05±20.06               | 35.58±15.86                   | 36.78±16.91           | 1.28        | 0.20   |
| H&Y staging                    | 2.40±0.82                 | 2.18±0.59                     | 2.23±0.65             | 1.10        | 0.28   |
| TDQ                            | 17.00±6.36                | 5.85±4.43                     | 7.80±6.41             | 9.65        | <0.001 |
| BFS total scores               | 63.52±17.28               | 71.58±12.69                   | 70.17±13.87           | -2.47       | 0.015  |
| Acceptance                     | 9.14±2.69                 | 11.05±2.08                    | 10.72±2.31            | -3.62       | <0.001 |
| Family Relations               | 6.86±2.33                 | 7.72±1.76                     | 7.57±1.89             | -1.60       | 0.12   |
| World View                     | 9.95±3.43                 | 10.74±3.34                    | 10.60±3.36            | -0.97       | 0.33   |
| Personal Growth                | 19.71±6.25                | 22.36±5.68                    | 21.90±5.85            | -1.91       | 0.06   |
| Social Relations               | 8.38±4.20                 | 9.01±3.79                     | 8.90±3.86             | -0.68       | 0.50   |
| Health Behavior                | 9.48±2.79                 | 10.70±2.57                    | 10.48±2.64            | -1.95       | 0.054  |
| DS total scores                | 30.81±12.34               | 25.98±8.94                    | 26.83±9.74            | 1.70        | 0.10   |
| Loss of meaning                | 5.33±2.06                 | 4.84±1.96                     | 4.93±1.98             | 1.04        | 0.30   |
| Dysphoria                      | 7.33±4.05                 | 5.34±1.97                     | 5.69±2.56             | 2.20        | 0.039  |
| Disheartenment                 | 6.33±3.54                 | 5.14±2.17                     | 5.35±2.49             | 1.49        | 0.15   |
| Helplessness                   | 5.24±2.83                 | 4.48±2.52                     | 4.62±2.58             | 1.22        | 0.23   |
| Sense of failure               | 5.19±1.60                 | 4.94±1.83                     | 4.98±1.79             | 0.58        | 0.56   |
| EMIC total scores              | 8.86(0-27)                | 2.48(0-21)                    | 3.60(0-27)            | 3.39        | 0.003  |

**Note:** Category data are presented as n (%), continuous variables are presented as score± SD.

**Abbreviations:** PD= Parkinson's disease; NPRS= Numerical Pain Rating Scale; UPDRS= Unified Parkinson's Disease Rating Scale; H&Y staging=Hoehn and Yahr staging; TDQ=Taiwanese Depression Questionnaire; BFS= Benefit Finding Scale; DS= Demoralization Scale; EMIC= Stigma Subscale of Explanatory Model Interview Catalogue

**Table S2** Demographic and clinical characteristics of depressive and non-depressive caregivers (N=120)

|                                | Depressive<br>N (%), N=16 | Non-depressive<br>N (%), N=104 | Total<br>N (%), N=120 | t/ $\chi^2$ | P      |
|--------------------------------|---------------------------|--------------------------------|-----------------------|-------------|--------|
| Gender (%)                     |                           |                                |                       | 0.59        | 0.44   |
| Male                           | 5(31.3)                   | 43(41.3)                       | 48(40.0)              |             |        |
| Female                         | 11(68.8)                  | 61(58.7)                       | 72(60.0)              |             |        |
| Age, years mean (s.d.)         | 60.81±12.56               | 60.81±12.82                    | 60.81±12.73           | 0.001       | 1.00   |
| Duration of caring (years)     | 8.50±5.80                 | 8.39±7.32                      | 8.40±7.12             | 0.06        | 0.95   |
| Years of education             | 12.50±5.10                | 12.29±4.00                     | 12.32±4.14            | 0.19        | 0.85   |
| Education                      |                           |                                |                       | 0.03        | 0.87   |
| Less than 12 years             | 4(25.0)                   | 24(23.1)                       | 28(23.3)              |             |        |
| More than or equal to 12 years | 12(75.0)                  | 80(76.9)                       | 92(76.7)              |             |        |
| Marital Status                 |                           |                                |                       | 0.53        | 0.47   |
| Unmarried                      | 1(6.3)                    | 13(12.5)                       | 14(11.7)              |             |        |
| Married                        | 15(93.8)                  | 91(87.5)                       | 106(88.3)             |             |        |
| Unemployment                   | 9(56.3)                   | 66(63.5)                       | 75(62.5)              | 0.31        | 0.58   |
| Comorbid with other diseases   | 9(56.3)                   | 51(49.0)                       | 60(50.0)              | 0.29        | 0.59   |
| Suicide history                | 1(6.3)                    | 1(1.0)                         | 2(1.7)                | 2.37        | 0.12   |
| Anxiolytics/Hypnotics use      | 6(37.5)                   | 17(16.3)                       | 23(19.2)              | 4.01        | 0.045  |
| Family psychiatric history     |                           |                                |                       | 0.16        | 0.69   |
| No psychiatric history         | 16(100.0)                 | 103(99.0)                      | 119(99.2)             |             |        |
| Depressive disorder            | 0                         | 1(1.0)                         | 1(0.8)                |             |        |
| Family suicide history         | 0                         | 2(1.9)                         | 2(1.7)                | 0.31        | 0.58   |
| NPRS                           | 3.37(0-7)                 | 2.36(0-10)                     | 2.49(0-10)            | 1.63        | 0.11   |
| TDQ                            | 15.81(0-24)               | 3.17(0-17)                     | 4.86(0-24)            | 8.49        | <0.001 |
| BFS total scores               | 64.50±10.85               | 74.34±13.46                    | 73.02±13.52           | -2.78       | 0.006  |
| Acceptance                     | 10.50±2.00                | 11.03±2.61                     | 10.96±2.54            | -0.77       | 0.44   |
| Family Relations               | 6.13±1.75                 | 7.60±1.64                      | 7.40±1.72             | -3.31       | 0.001  |
| World View                     | 10.19±3.29                | 11.82±3.35                     | 11.60±3.37            | -1.82       | 0.07   |
| Personal Growth                | 20.50±5.77                | 24.34±5.31                     | 23.83±5.51            | -2.66       | 0.009  |
| Social Relations               | 7.88±3.88                 | 8.78±3.40                      | 8.66±3.47             | -0.97       | 0.33   |
| Health Behavior                | 9.31±2.98                 | 10.78±2.98                     | 10.58±3.01            | -1.84       | 0.07   |
| DS total scores                | 32.50±14.24               | 24.36±9.45                     | 25.44±10.52           | 2.21        | 0.041  |
| Loss of meaning                | 4.75±3.75                 | 4.66±2.28                      | 4.68±2.51             | 0.09        | 0.93   |
| Dysphoria                      | 7.94±4.07                 | 5.12±2.33                      | 5.49±2.78             | 2.70        | 0.015  |
| Disheartenment                 | 7.44±4.55                 | 5.17±2.52                      | 5.48±2.95             | 1.95        | 0.07   |
| Helplessness                   | 5.19±2.88                 | 3.88±1.83                      | 4.06±2.04             | 1.76        | 0.10   |
| Sense of failure               | 5.56±1.71                 | 4.45±2.19                      | 4.60±2.16             | 1.94        | 0.06   |
| EMIC total scores              | 5.81(0-15)                | 1.98(0-17)                     | 2.49(0-17)            | 2.53        | 0.022  |

**Note:** Category data are presented as n (%), continuous variables are presented as score± SD.

**Abbreviations:** PD= Parkinson's disease; NPRS= Numerical Pain Rating Scale; UPDRS= Unified Parkinson's Disease Rating Scale; H&Y staging=Hoehn and Yahr staging; TDQ=Taiwanese Depression Questionnaire; BFS= Benefit Finding Scale; DS= Demoralization Scale; EMIC= Stigma Subscale of Explanatory Model Interview Catalogue
